# Supplementary material for: Identification of ATF3 as a novel protective signature of quiescent colorectal tumor cells
Source: PubMed Central journal article supplement (PMC10576032; doi:10.1038/s41419-023-06204-1), 2023-10-13

Figure 2G

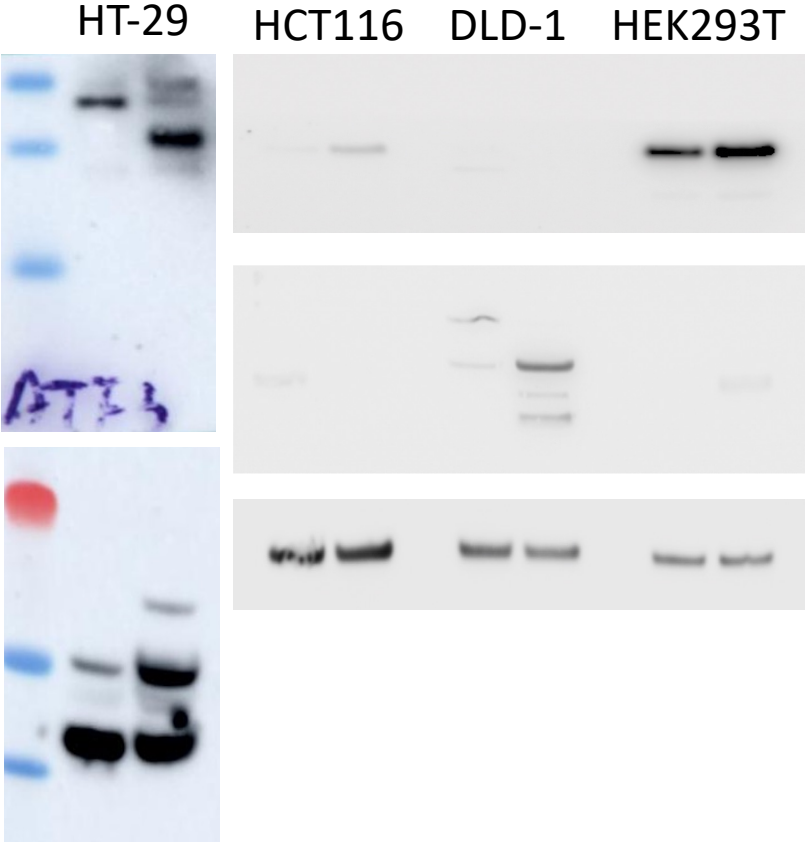

Figure 4A

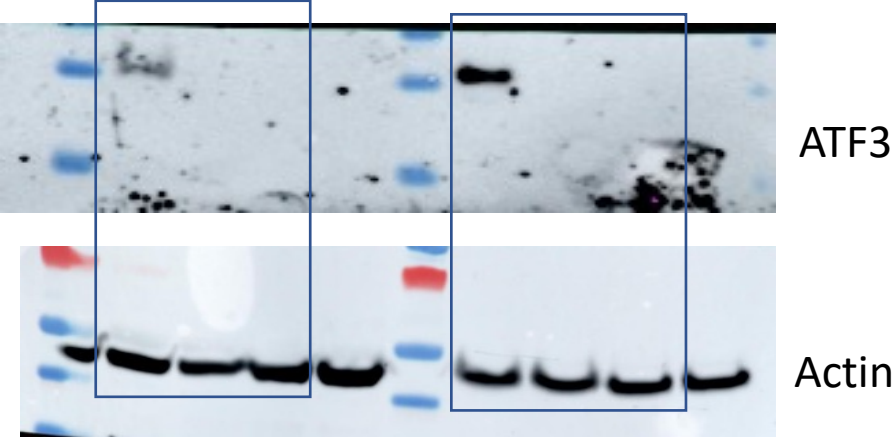

Figure 4I

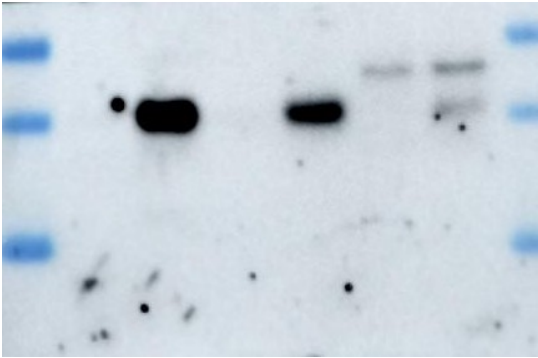

ATF3

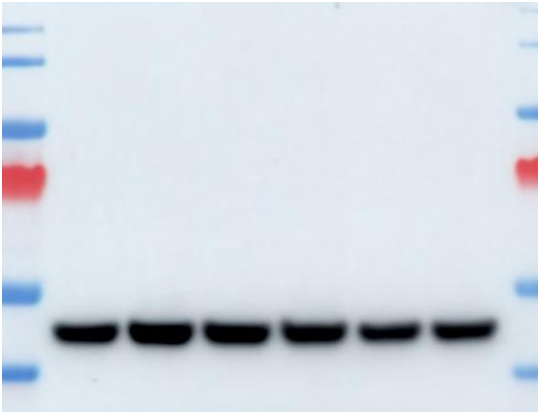

Actin

Figure 4J

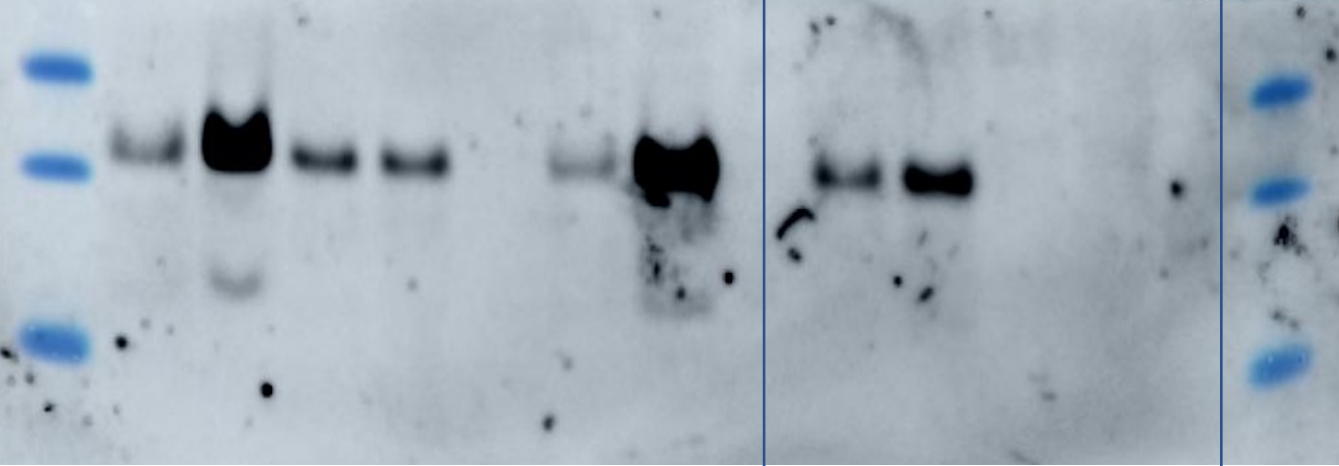

ATF3

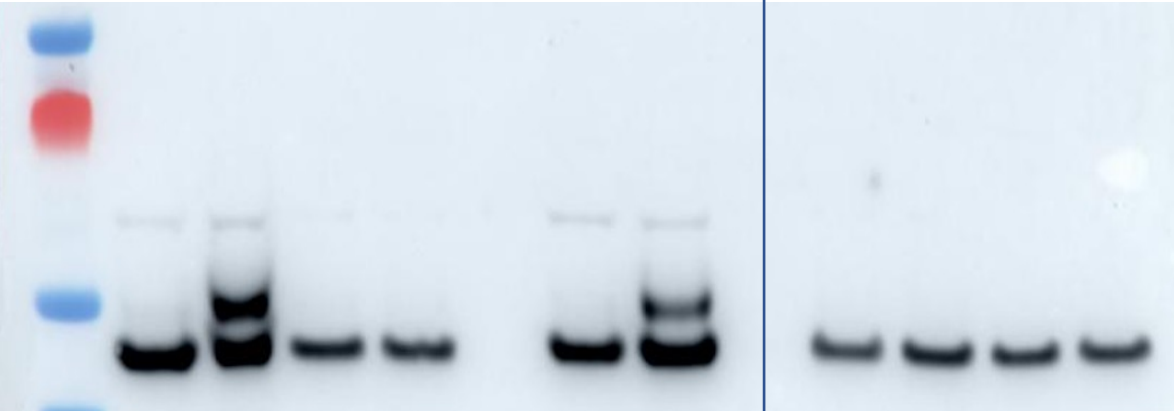

Actin

Figure 6B

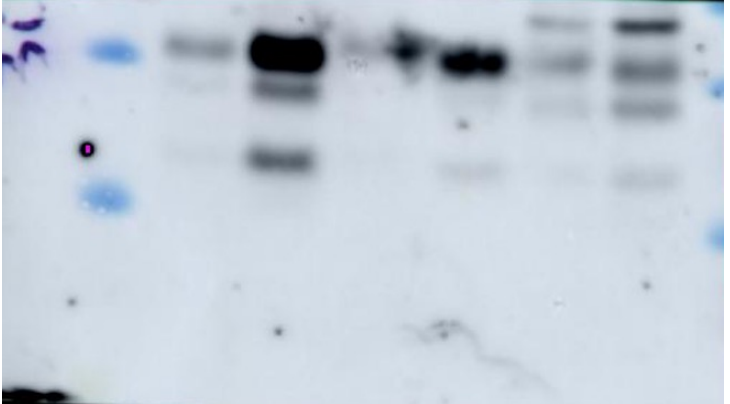

ATF3

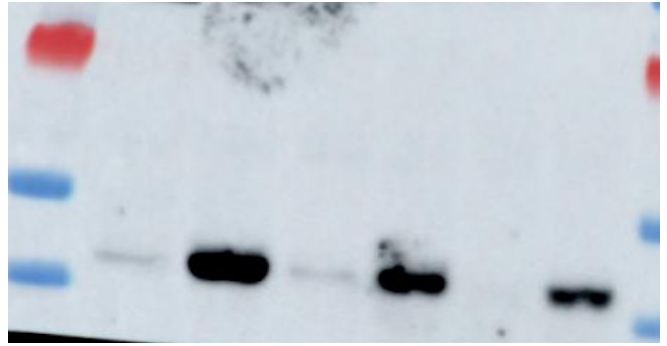

TRIB3

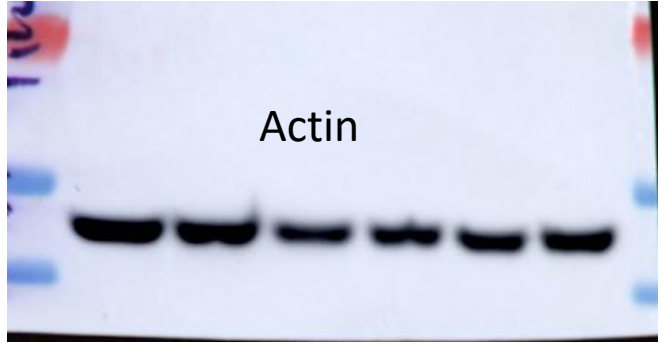

Actin

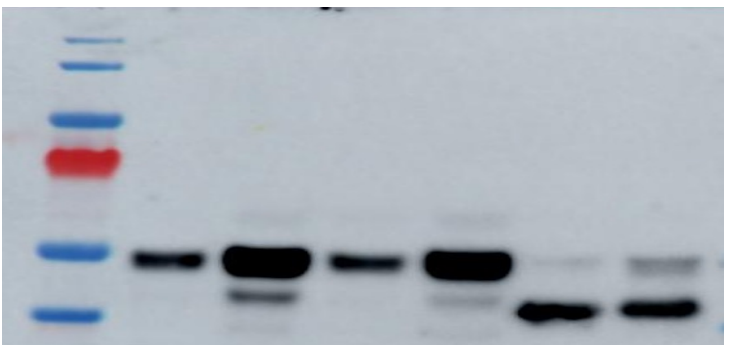

ATF4

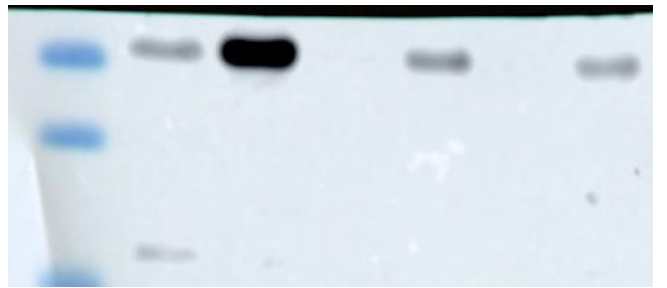

DDIT4

Figure 6D

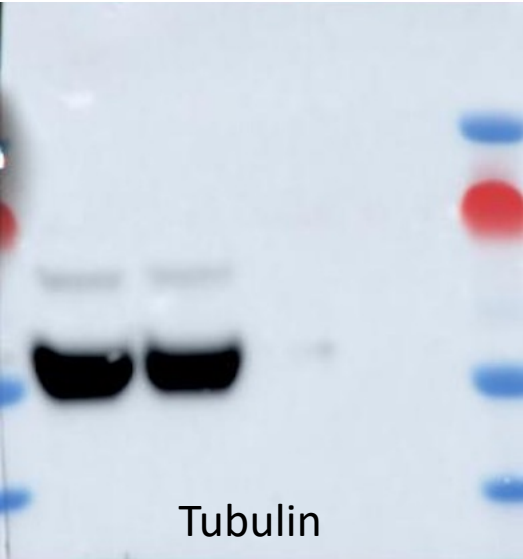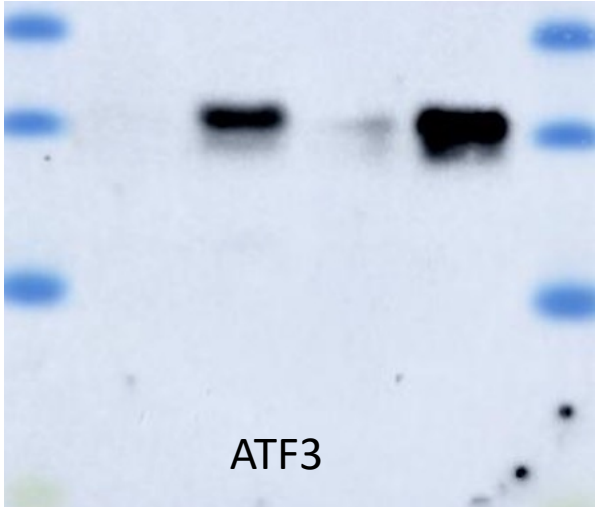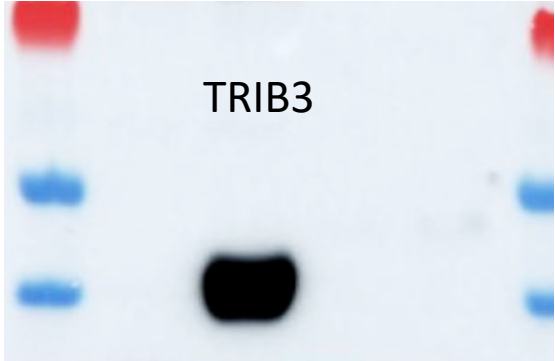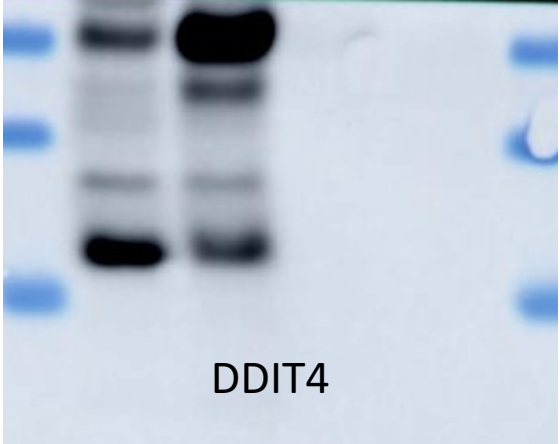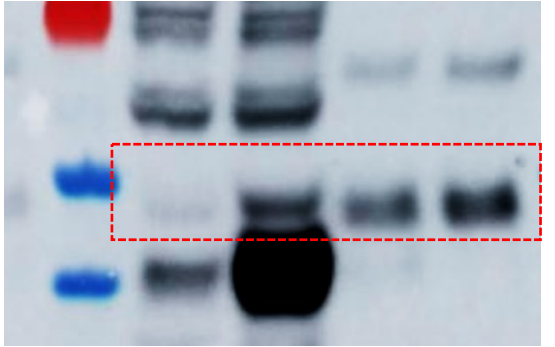

Figure 6E

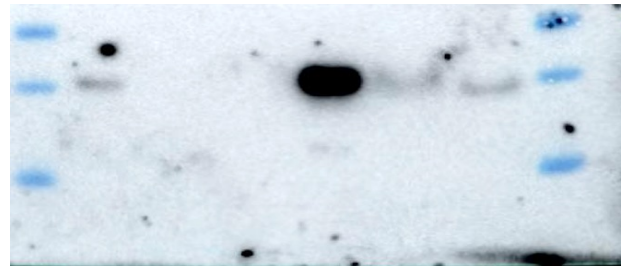

ATF3

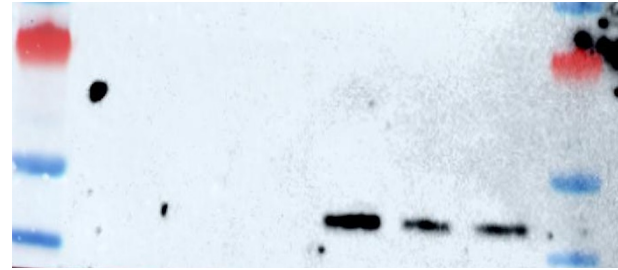

TRIB3

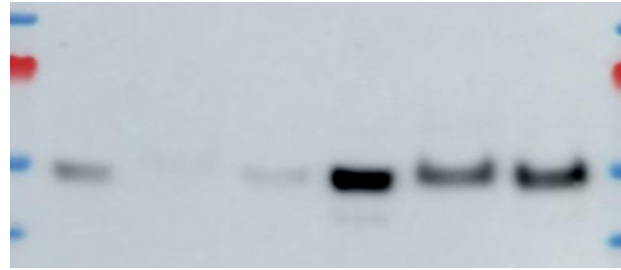

ATF4

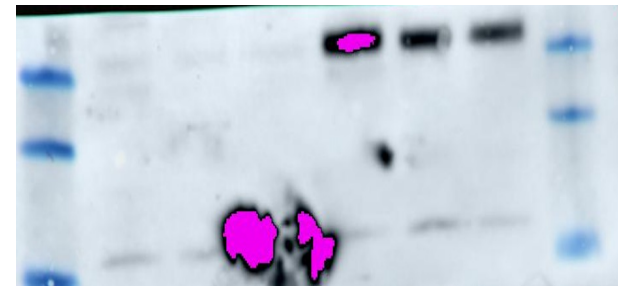

DDIT4

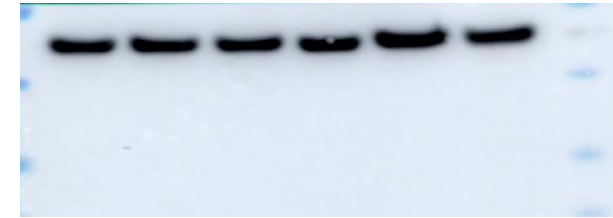

Actin

Figure 6G

HCT116

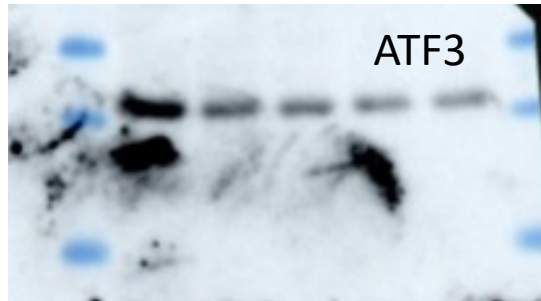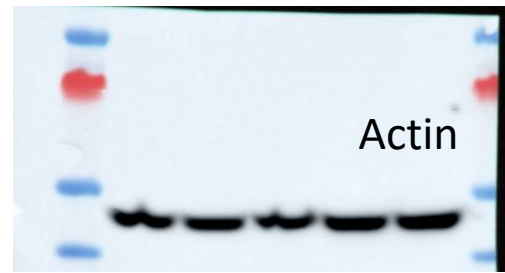

HT-29

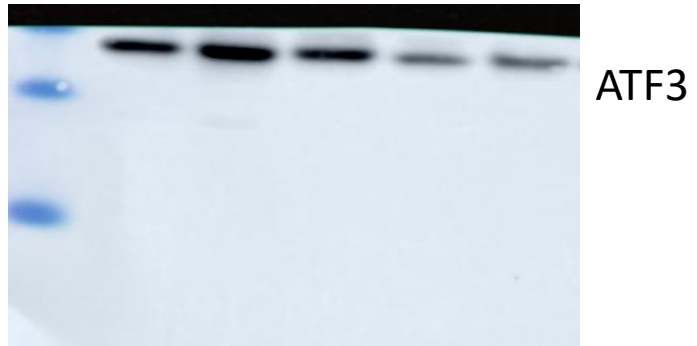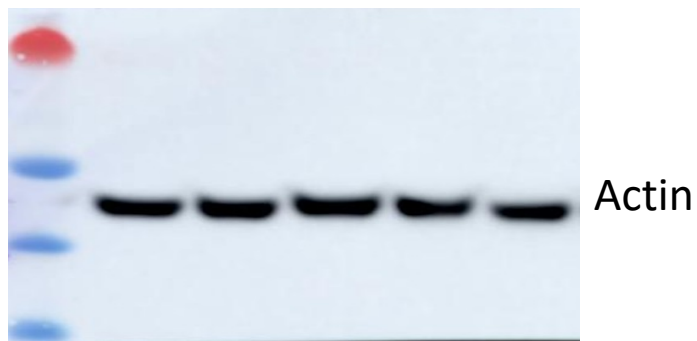

Figure 6H

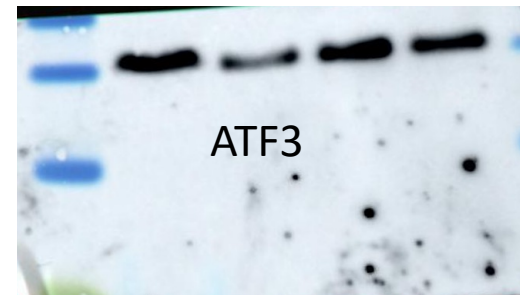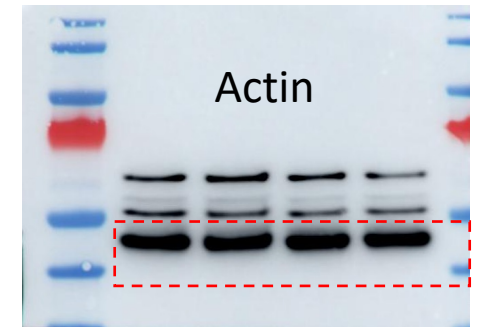

Fig. S4B

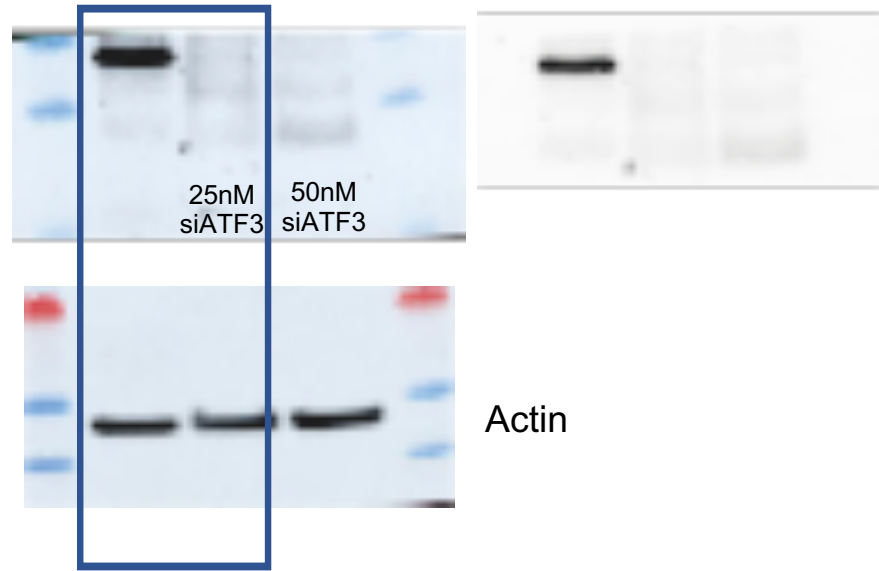

Supplement: 41419_2023_6204_MOESM2_ESM.pdf [file 41419_2023_6204_MOESM2_ESM.pdf]
